# Supplementary material for: Modulation of the luminescence quantum efficiency for blue luminophor {Al(salophen)}+ by ester-substituents
Source: Royal Society of Chemistry journal article supplement (doi:10.1039/b918235g), 2010-01-01

## **Modulation of the luminescence quantum efficiency for blue luminophor {Al(salophen)}<sup>+</sup> by ester-substituents**

Virginie Béreau<sup>a,b,c\*</sup>, Véronique Jubéra<sup>d</sup>, Philippe Arnaud<sup>a,b</sup>, Abdellah Kaiba<sup>d</sup>, Philippe Guionneau<sup>d</sup>, and Jean-Pascal Sutter<sup>a,b\*</sup>

<sup>a</sup> CNRS ; LCC (Laboratoire de Chimie de Coordination) ; 205 route de Narbonne, F-31077 Toulouse, France.

<sup>b</sup> Université de Toulouse ; UPS, INPT ; LCC ; F31077 Toulouse, France

<sup>c</sup> IUT Paul Sabatier, Département Chimie, Av. G. Pompidou, BP 258, 81104 Castres, France.

<sup>d</sup> CNRS, Université de Bordeaux, ICMCB, 87 avenue du Dr A. Schweitzer, Pessac, F-33608, France

### **Content:**

**Synthetic details for Zn and Cu complexes 5b and 6b**

**Table 1-ESI.** Experimental and crystal data for **PyO-4b**

**Table 2-ESI.** Photophysical data of Schiff bases **3a-c** ( $\lambda_{\text{exc}} = 385 \text{ nm}$ ,  $5.0 \times 10^{-6} \text{ M}$  in DMSO)

**Table 3-ESI.** Photophysical data of complexes **5b** (Zn) and **6b** (Cu) ( $\lambda_{\text{exc}} = 385 \text{ nm}$ ,  $5.0 \times 10^{-6} \text{ M}$  in DMSO)

**Table 4-ESI.** Photophysical data of salophen and its complexes of Al, Zn, and Cu ( $\lambda_{\text{exc}} = 378 \text{ nm}$ ,  $5.0 \times 10^{-6} \text{ M}$  in DMSO)

**Table 5-ESI** Most important electronic transitions (nm) computed for **4b** and **4c**, with the associated oscillator strength (a threshold of 0.01 has been used for the reported oscillator strength).

**Figure 1-ESI.** Internal and external quantum yields of (*from top*) **3b**, **4b**, and **5b** calculated from the standard NBS1028 ( $\text{Zn}_2\text{SiO}_4 \cdot \text{Mn}^{2+}$ ).

**Figure 2-ESI.** Trichromatic coordinates diagram ([http://www.cie.co.at/index\\_ie.html](http://www.cie.co.at/index_ie.html))

Synthetic details for Zn and Cu complexes **5b** and **6b**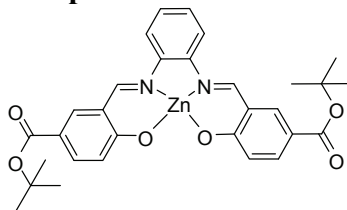

***N,N'*-bis-(3-*tert*-butoxycarbonylsalicylidene)-1,2-phenylenediamine zinc (II).H<sub>2</sub>O (**5b**):** A suspension of **3b** (93 mg; 0.18 mmol) in 18 mL of methanol was prepared. To this suspension, a solution of Zn(OAc)<sub>2</sub>.2H<sub>2</sub>O (39.3 mg; 0.18 mmol) in 12 mL of methanol was added dropwise. The resulting mixture was then refluxed for 2h and cooled down to room temperature. The yellow precipitate obtained was isolated by filtration, washed with water and dried under vacuum (84 mg, 82%). Anal. Calcd for C<sub>30</sub>H<sub>30</sub>N<sub>2</sub>O<sub>6</sub>Zn.H<sub>2</sub>O: C, 60.26; H, 5.39; N, 4.68. Found: C, 60.60, H, 5.22, N, 5.11. <sup>1</sup>H NMR ((CD<sub>3</sub>)<sub>2</sub>CO) δ 9.15 (2H, s, HC=N), 8.16 (2H, d, Ar-H), 8.00 (2H, m, Ar-H), 7.76 (2H, dd, Ar-H), 7.48 (2H, m, Ar-H), 6.74 (2H, d, Ar-H), 1.57 (18H, s, CH<sub>3</sub>). ν<sub>max</sub>/cm<sup>-1</sup> 1710 (COO), 1613 (C=N).

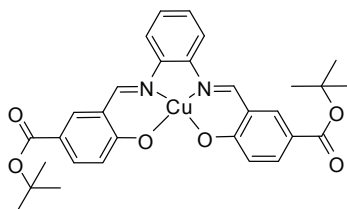

***N,N'*-bis-(3-*tert*-butoxycarbonylsalicylidene)-1,2-phenylenediamine copper (II).CH<sub>3</sub>OH (**6b**):** To a suspension of **3b** (93 mg; 0.18 mmol) in 18 mL of methanol, a solution of Cu(OAc)<sub>2</sub>.H<sub>2</sub>O (35.4 mg; 0.18 mmol) in 12 mL of methanol was added dropwise. The resulting mixture was then refluxed for 2h and cooled down to room temperature. The brown precipitate obtained was isolated by filtration, washed with water and dried under vacuum (63 mg, 61%). Anal. Calcd for C<sub>30</sub>H<sub>30</sub>N<sub>2</sub>O<sub>6</sub>Cu.3CH<sub>3</sub>OH: C, 58.79; H, 6.28; N, 4.15. Found: C, 58.48, H, 6.21, N, 4.39. ν<sub>max</sub>/cm<sup>-1</sup> 1712 (COO), 1611 (C=N).

**Table 1-ESI.** Experimental and crystal data for **PyO-4b**

|                                   |                                                                                                                |
|-----------------------------------|----------------------------------------------------------------------------------------------------------------|
| Formula                           | C <sub>40</sub> H <sub>46</sub> AlN <sub>5</sub> O <sub>14</sub>                                               |
| Formula weight                    | 847.80                                                                                                         |
| Asymmetric unit cont.             | C <sub>40</sub> H <sub>46</sub> AlN <sub>5</sub> O <sub>14</sub>                                               |
| Crystal system                    | Triclinic                                                                                                      |
| Space group                       | P-1                                                                                                            |
| Unit cell dimensions              | a = 12.256(3) Å<br>b = 12.790(3) Å<br>c = 14.959(4) Å<br>α = 68.740(10)°<br>β = 70.910(10)°<br>γ = 81.620(10)° |
| Volume                            | 2064.1(9) Å <sup>3</sup>                                                                                       |
| Density (calculated)              | 1.364 Mg/m <sup>3</sup>                                                                                        |
| Absorption coefficient            | 0.123 mm <sup>-1</sup>                                                                                         |
| Theta range for data collection   | 3.41 to 22.72°                                                                                                 |
| Index ranges                      | -13 ≤ h ≤ 12<br>-13 ≤ k ≤ 13<br>-16 ≤ l ≤ 16                                                                   |
| Reflections collected             | 8854                                                                                                           |
| Independent reflections           | 5294 [R(int) = 0.0809]                                                                                         |
| Completeness to theta = 22.72°    | 95.3 %                                                                                                         |
| Data / restraints / parameters    | 5294 / 0 / 547                                                                                                 |
| Goodness-of-fit on F <sup>2</sup> | 0.970                                                                                                          |
| Final R indices [I > 2σ(I)]       | R1 = 0.0735<br>wR2 = 0.1714                                                                                    |
| R indices (all data)              | R1 = 0.1531<br>wR2 = 0.2186                                                                                    |
| Largest diff. peak and hole       | 0.544 and -0.363 e.Å <sup>-3</sup>                                                                             |

*ELECTRONIC SUPPLEMENTARY INFORMATION*

**Table 2-ESI.** Photophysical data of Schiff bases **3a-c** ( $\lambda_{\text{exc}} = 385 \text{ nm}$ ,  $5.0 \times 10^{-6} \text{ M}$  in DMSO)

| Schiff base                             | Absorption                     |                                                 | Emission                      |                            |
|-----------------------------------------|--------------------------------|-------------------------------------------------|-------------------------------|----------------------------|
|                                         | $\lambda_{\text{max}}$<br>(nm) | $\epsilon$<br>( $\text{M}^{-1}\text{cm}^{-1}$ ) | $\lambda_{\text{em}}$<br>(nm) | $\phi^{\text{[a]}}$<br>(%) |
| (R = CH <sub>3</sub> )                  |                                |                                                 |                               |                            |
| <b>3a</b>                               | 310                            | 26000                                           | 474                           | 3                          |
|                                         | 382                            | 12000                                           |                               |                            |
|                                         | 420                            | 8600                                            |                               |                            |
| (R = (CH <sub>3</sub> ) <sub>3</sub> C) |                                |                                                 |                               |                            |
| <b>3b</b>                               | 334                            | 19280                                           | 481                           | 1                          |
|                                         | 382                            | 20400                                           |                               |                            |
| (R = C <sub>6</sub> H <sub>5</sub> )    |                                |                                                 |                               |                            |
| <b>3c</b>                               | 278                            | 36800                                           | 478                           | 7                          |
|                                         | 332                            | 8000                                            |                               |                            |
|                                         | 378                            | 7600                                            |                               |                            |

<sup>[a]</sup> Quinine sulfate ( $\phi = 0.55$ ) used as standard

**Table 3-ESI.** Photophysical data of complexes **5b** (Zn) and **6b** (Cu) ( $\lambda_{\text{exc}} = 385 \text{ nm}$ ,  $5.0 \times 10^{-6} \text{ M}$  in DMSO)

| Complexes | Absorption                     |                                                 | Emission                      |                            |
|-----------|--------------------------------|-------------------------------------------------|-------------------------------|----------------------------|
|           | $\lambda_{\text{max}}$<br>(nm) | $\epsilon$<br>( $\text{M}^{-1}\text{cm}^{-1}$ ) | $\lambda_{\text{em}}$<br>(nm) | $\phi^{\text{[a]}}$<br>(%) |
| <b>5b</b> | 290                            | 73200                                           | 478                           | 0.2                        |
|           | 390                            | 21100                                           |                               |                            |
| <b>6b</b> | 293                            | 103000                                          | 478                           | 0.04                       |
|           | 411                            | 19800                                           |                               |                            |

<sup>[a]</sup> Quinine sulfate ( $\phi = 0.55$ ) used as standard

**Table 4-ESI.** Photophysical data of salophen and its complexes of Al, Zn, and Cu ( $\lambda_{\text{exc}} = 378 \text{ nm}$ ,  $5.0 \times 10^{-6} \text{ M}$  in DMSO).

| Compound                          | $\lambda_{\text{max}}$ (nm) | $\lambda_{\text{em}}$ (nm) | $\phi^{\text{[a]}}$ |
|-----------------------------------|-----------------------------|----------------------------|---------------------|
| <b>salophen</b>                   | 269, 350                    | 501                        | 0.003               |
| <b>Al(NO<sub>3</sub>)salophen</b> | 284, 338, 390               | 490                        | 0.01                |
| <b>Znsalophen</b>                 | 289, 340 (sh), 404          | 490                        | 0.002               |
| <b>Cusalophen</b>                 | 284, 427                    | 490                        | 0.002               |

<sup>[a]</sup> Quinine sulfate ( $\phi = 0.55$ ) used as standard

*ELECTRONIC SUPPLEMENTARY INFORMATION*

**Table 5-ESI** Most important electronic transitions (nm) computed for **4b** and **4c**, with the associated oscillator strength (a threshold of 0.01 has been used for the reported oscillator strength).

| <b>4b</b>                |                    | <b>4c</b>                |                    |
|--------------------------|--------------------|--------------------------|--------------------|
| $\lambda_{\text{calcd}}$ | $f_{\text{calcd}}$ | $\lambda_{\text{calcd}}$ | $f_{\text{calcd}}$ |
| <b>413</b>               | <b>0.442</b>       | <b>416</b>               | <b>0.494</b>       |
| 382                      | 0.014              | 382                      | 0.015              |
| <b>368</b>               | <b>0.397</b>       | <b>369</b>               | <b>0.417</b>       |
| 352                      | 0.024              | 352                      | 0.014              |
| <b>336</b>               | <b>0.329</b>       | <b>336</b>               | <b>0.251</b>       |
| 322                      | 0.055              | 331                      | 0.080              |
| <b>312</b>               | <b>0.470</b>       | <b>322</b>               | <b>0.058</b>       |
| 302                      | 0.041              | 312                      | 0.445              |
| <b>266</b>               | <b>0.447</b>       | <b>308</b>               | <b>0.017</b>       |
| 263                      | 0.081              | 301                      | 0.036              |
| 256                      | 0.141              | 279                      | 0.029              |
| 251                      | 0.015              | <b>278</b>               | <b>0.794</b>       |
| <b>250</b>               | <b>0.852</b>       | 277                      | 0.035              |

**Figure 1-ESI.** Internal and external quantum yields of (from top) **3b**, **4b**, and **5b** calculated from the standard NBS1028 ( $\text{Zn}_2\text{SiO}_4:\text{Mn}^{2+}$ ).

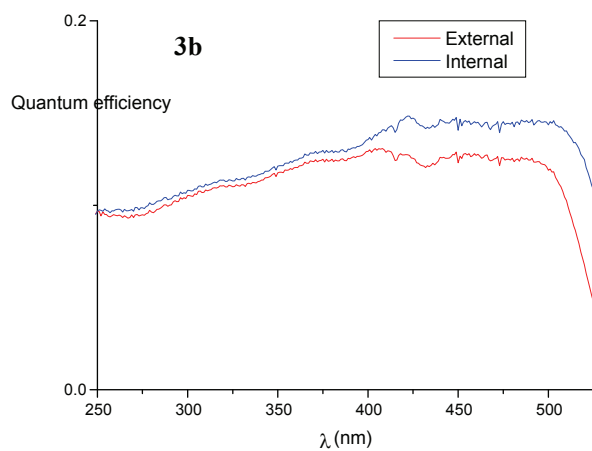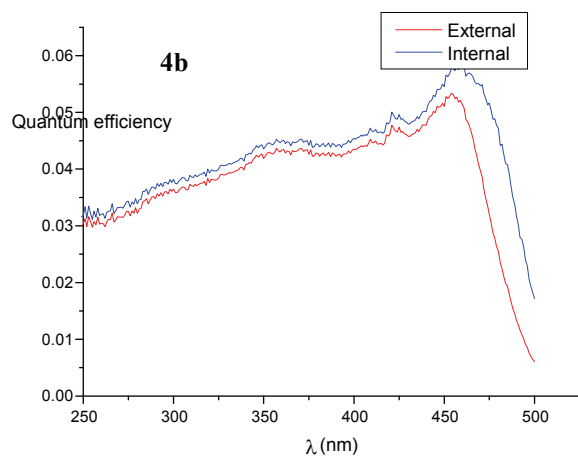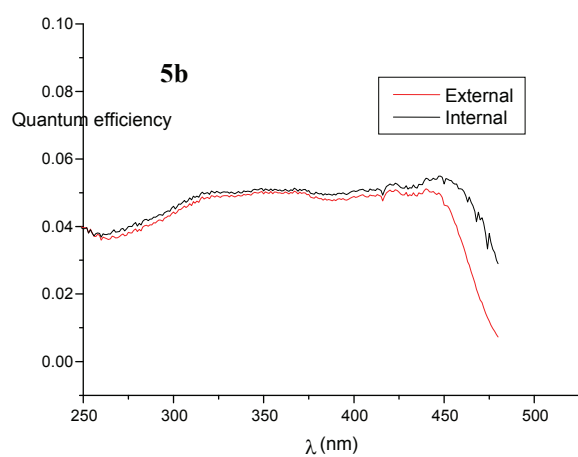

Figure 2-ESI. Trichromatic coordinates diagram ([http://www.cie.co.at/index\\_ie.html](http://www.cie.co.at/index_ie.html))

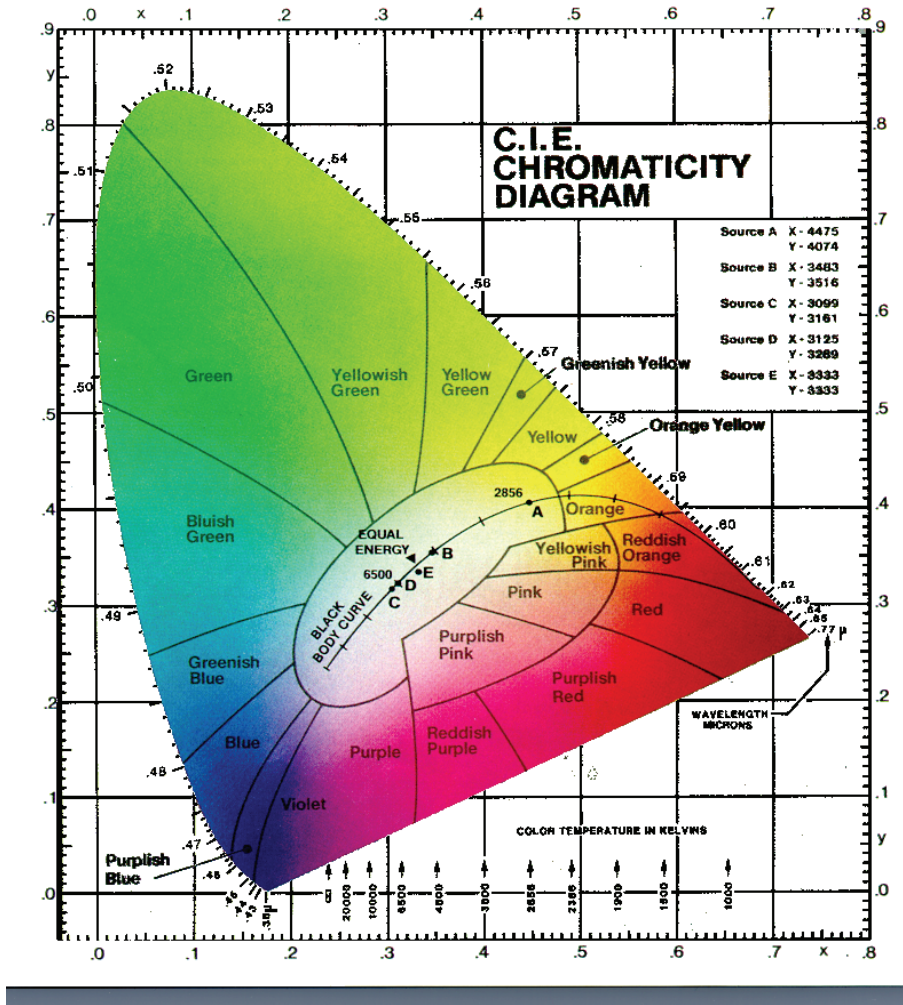

Supplement: b918235g.pdf [file b918235g.pdf]
